# Supplementary material for: Immune Reconstitution-Based Score for Risk Stratification of Chronic Graft-Versus-Host Disease Patients
Source: PubMed Central journal article supplement (PMC8341942; doi:10.3389/fonc.2021.705568), 2021-07-22
Supplement: DataSheet_1.pdf [file DataSheet_1.pdf]

## Supplementary Material

**Supplementary Figure 1** - Scheme of algorithm development and validation

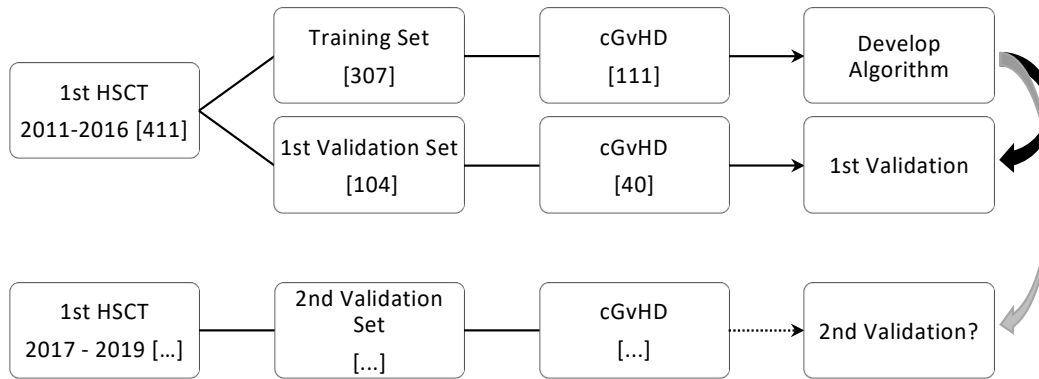

**Supplementary Figure 2** – Stratification of patients (training cohort + validation cohort) according to NIH consensus and IR score risk. Panel A patients classified with mild NIH cGvHD. Panel B patients classified with moderate NIH cGvHD. Panel C patients classified with severe NIH cGvHD.

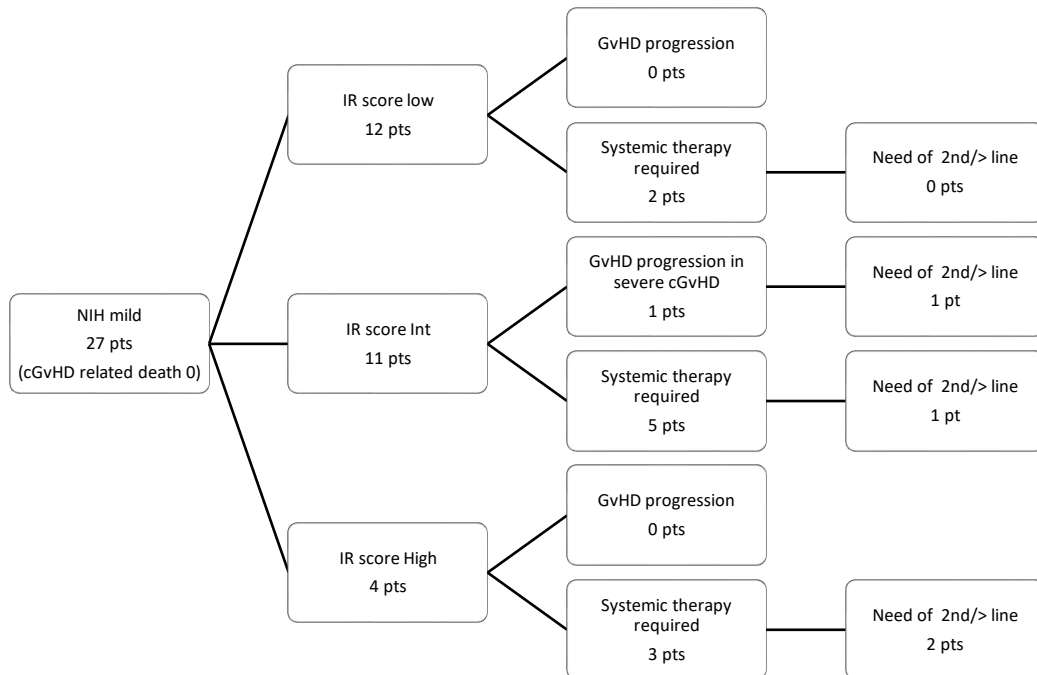

**A**

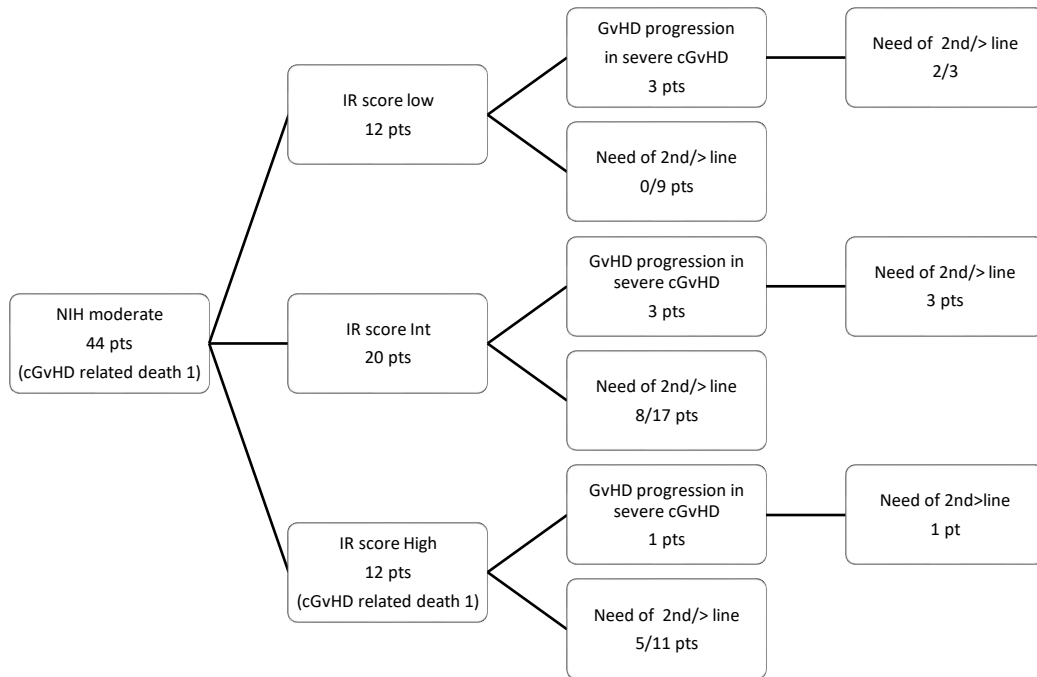

**B**

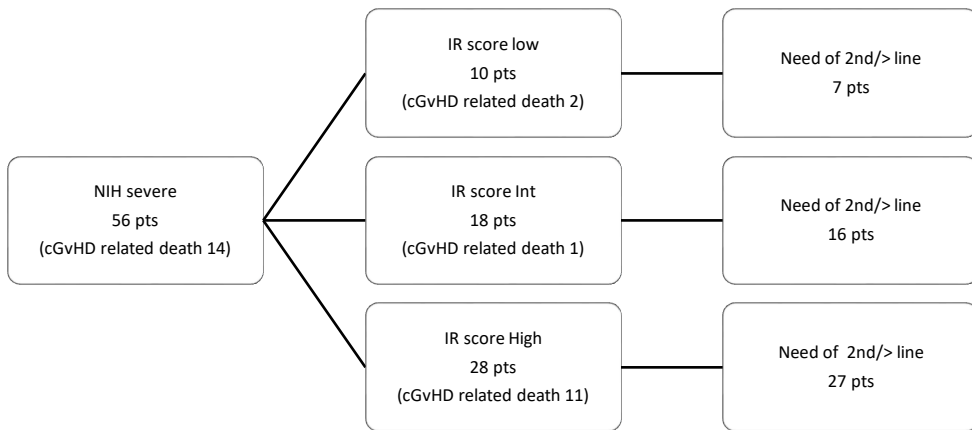

**C**
